# Supplementary material for: Large eddy simulation of ship tracks in the collapsed marine boundary layer: a case study from the Monterey area ship track experiment
Source: Copernicus journal article supplement (doi:10.5194/acp-15-5851-2015), 2015-05-27
Supplement: Supplementary file 1 [file acp-15-5851-2015-supplement.zip]

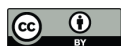

## *Supplement of*

# **Large eddy simulation of ship tracks in the collapsed marine boundary layer: a case study from the Monterey area ship track experiment**

**A. H. Berner et al.**

*Correspondence to:* A. H. Berner ([andy.berner@gmail.com](mailto:andy.berner@gmail.com))

- [acp-15-5851-2015-supplement-cover-letter.pdf](#)
- [BaseTrack\\_vs\\_SensHiAer\\_albedo.mp4](#)
- [BaseTrack\\_vs\\_SensPerp\\_albedo.mp4](#)
- [Shiptracks\\_NorthEastPacific\\_Dec2013.mp4](#)
- [Shiptracks\\_NorthEastPacific\\_Jan2013.mp4](#)

The copyright of individual parts of the supplement might differ from the CC-BY 3.0 licence.
